# Supplementary material for: A predicted orthogonal semimetallic carbon with negative thermal expansion and compressibility
Source: Royal Society of Chemistry journal article supplement (doi:10.1039/d2cp02761e), 2022-01-01
Supplement: d2cp02761e1.pdf [file d2cp02761e1.pdf]

# A predicted orthogonal semimetallic carbon with negative thermal expansion and compressibility

Zhen-Long Lv<sup>1</sup>, Hong-Ling Cui<sup>1</sup>, Cai Cheng<sup>2,\*</sup>

<sup>1</sup>School of Physics and Engineering, Henan University of Science and Technology,  
Luoyang 471023, China

<sup>2</sup>School of Physics and Electronic Engineering, Sichuan Normal University, Chengdu  
610101, China

## Supplementary materials

Figures:

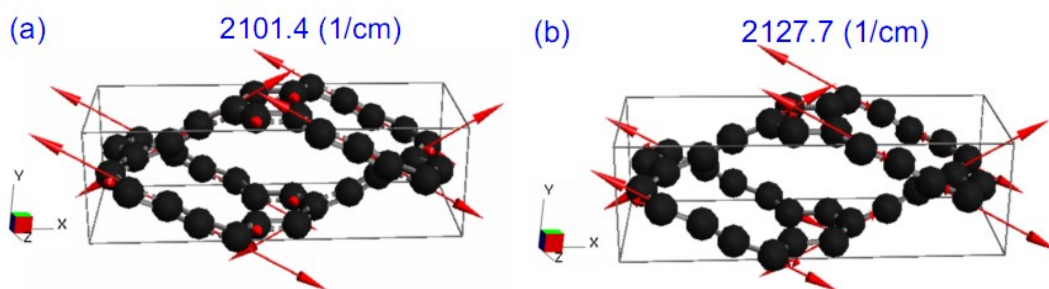

Fig. S1 Vibrational patterns of the two optical modes with the highest frequencies.

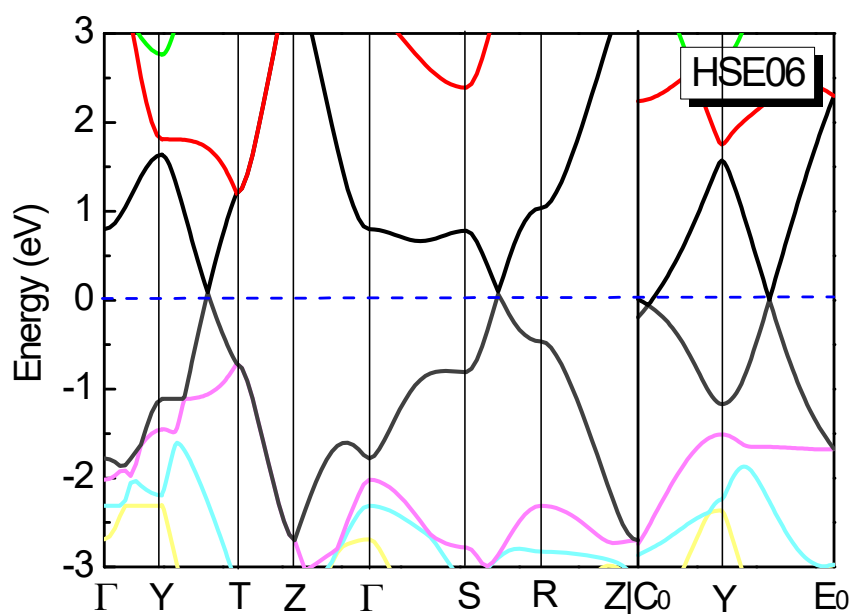

Fig. S2 Band structure of ort-C24 calculated by the HSE06 functional.

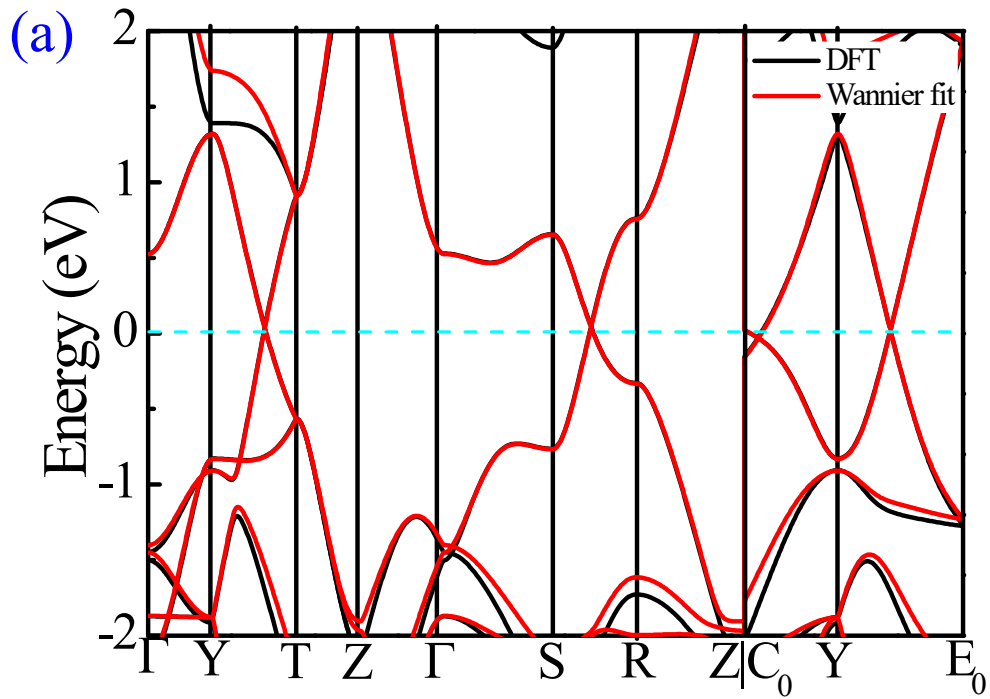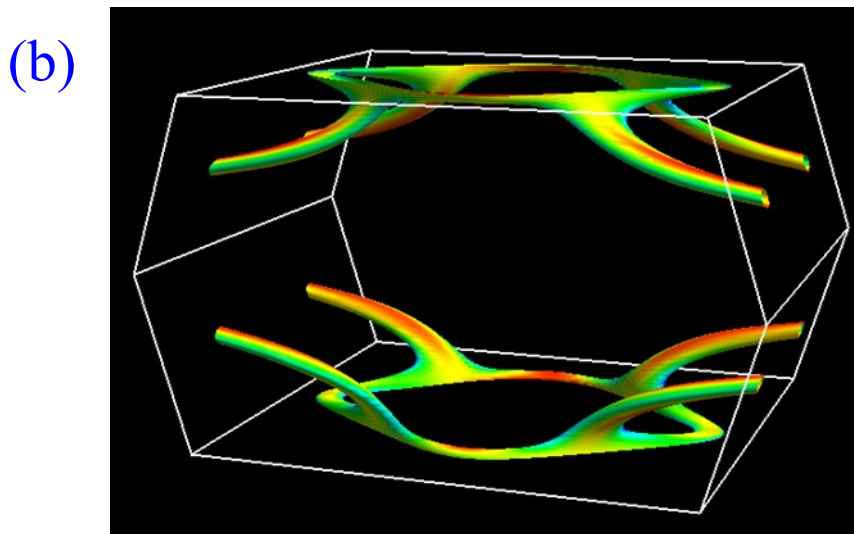

Fig. S3 (a) Fitted band structure (red) and (b) simulated Fermi surface of ort-C24 using the Wannier functions. For the possible calculation error, the energy for simulating is set to  $(E_F - 0.06)$  eV to highlight the Fermi surface. A similar result can be obtained when it is set to  $(E_F + 0.06)$  eV.

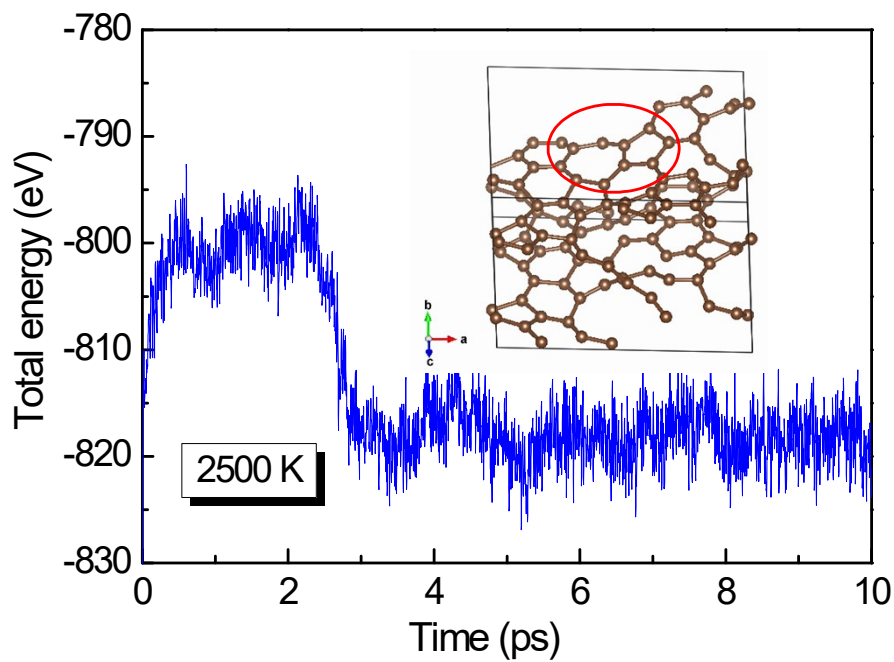

Fig. S4 Ab initio molecular dynamics simulated at 2500 K and 1 atmosphere for 10 ps using the Parrinello-Rahman dynamics with Langevin thermostat (NPT ensemble).

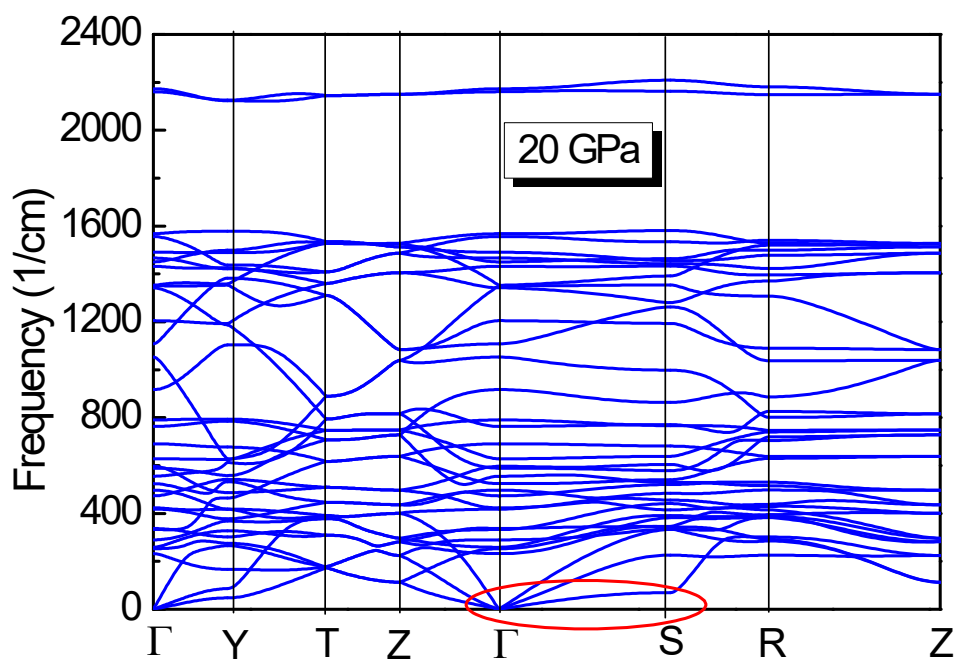

Fig. S5 Calculated phonon spectrum of ort-C24 under the hydrostatic pressure of 20 GPa.

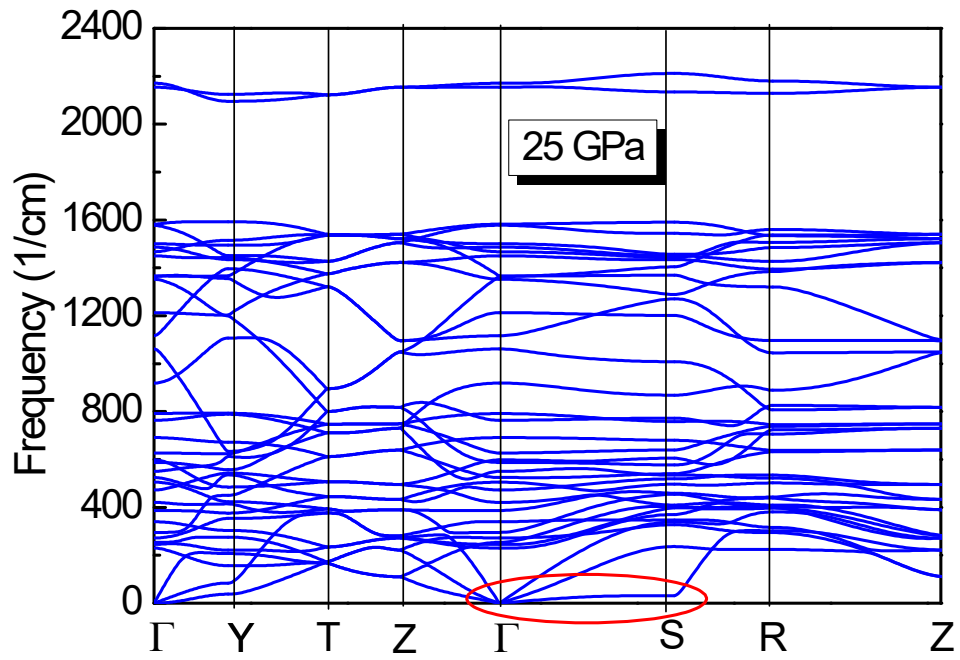

Fig. S6 Calculated phonon spectrum of ort-C24 under the hydrostatic pressure of 25 GPa. Small imaginary frequencies occur at the  $\Gamma$  point and obvious softness of phonon along the  $\Gamma$ -S direction.

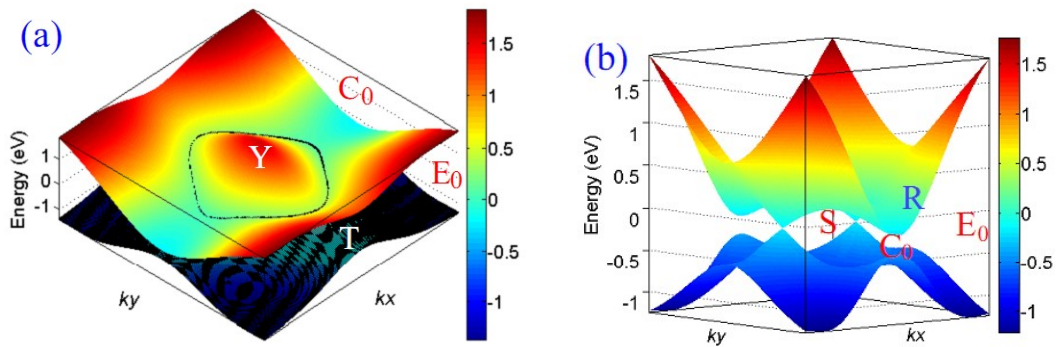

Fig. S7 Calculated energy-momentum relations in the (a)  $C_0$ -Y-T- $E_0$  plane and (b) R-S- $C_0$ - $E_0$  plane of the Brillouin zone of ort-C24 under 5 GPa.

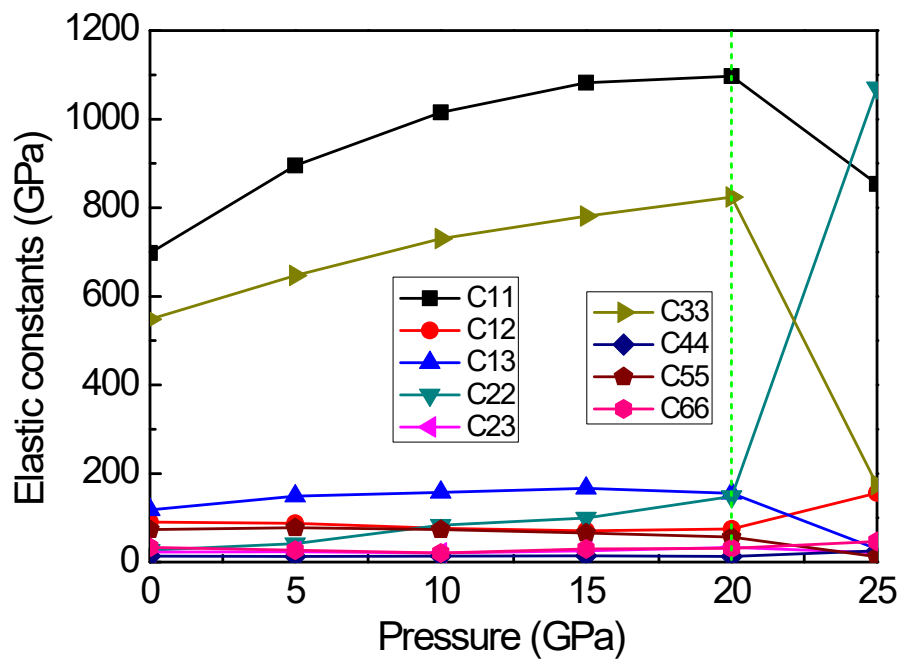

Fig. S8 Calculated elastic constants as a function of hydrostatic pressure up to 25 GPa at 0 K.

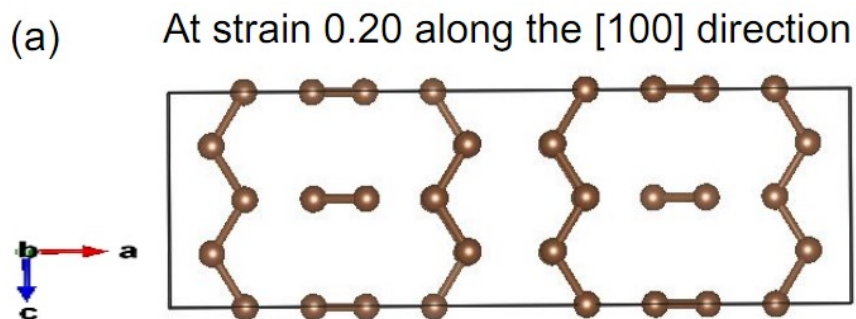

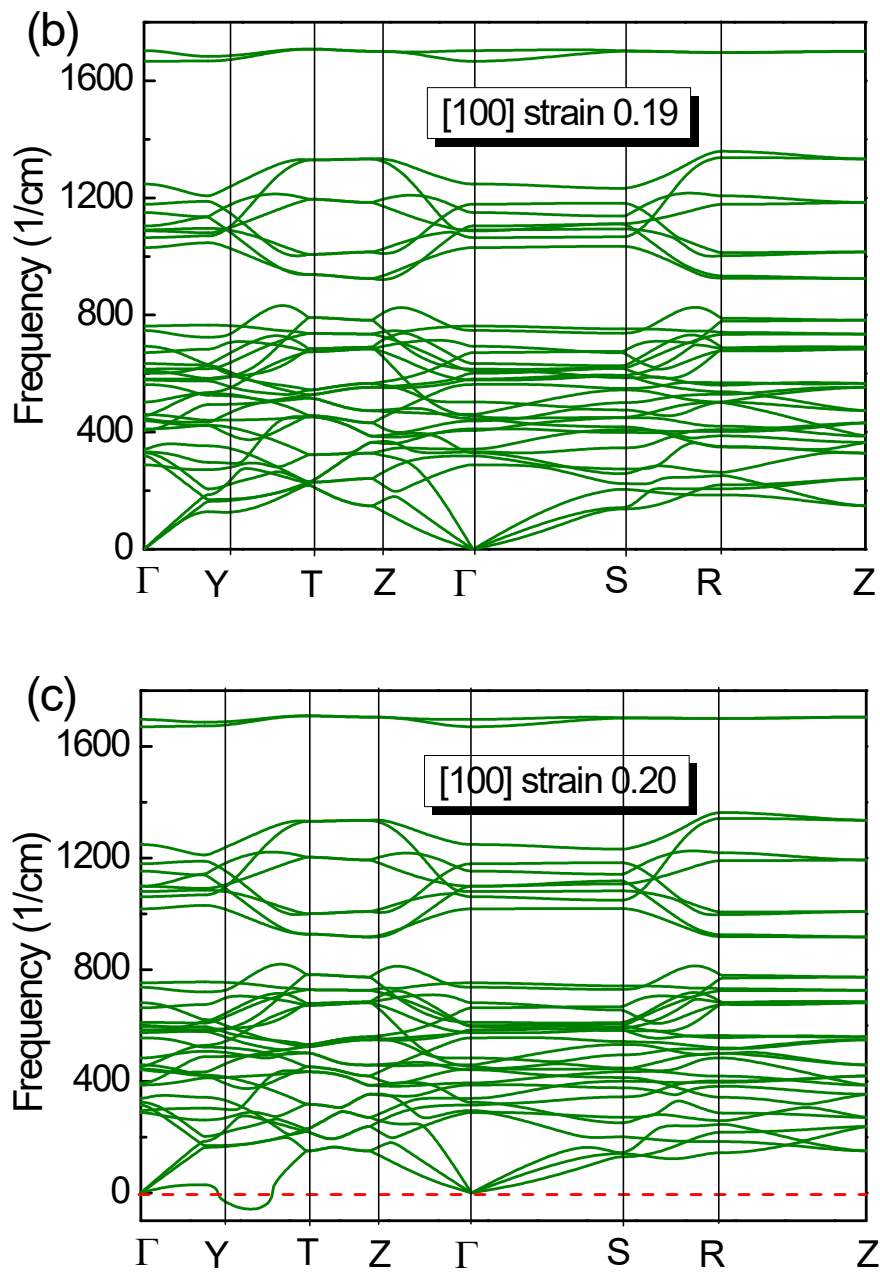

Fig. S9 (a) Crystal structure at the critical strain of 0.20, (b) phonon spectra at strains of 0.19 and (c) 0.20 of ort-C24.

(a) At the strains 1.15, 1.55 and 1.60 along the [010] direction

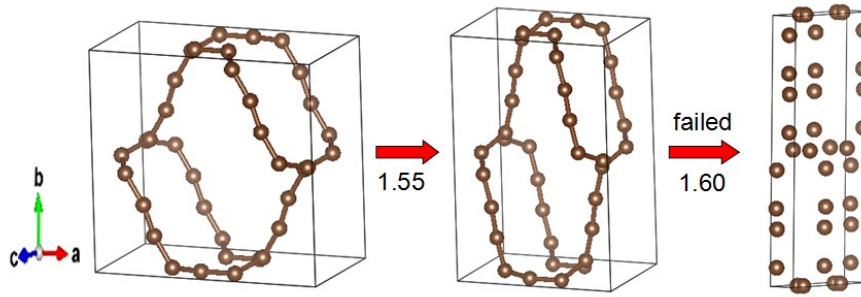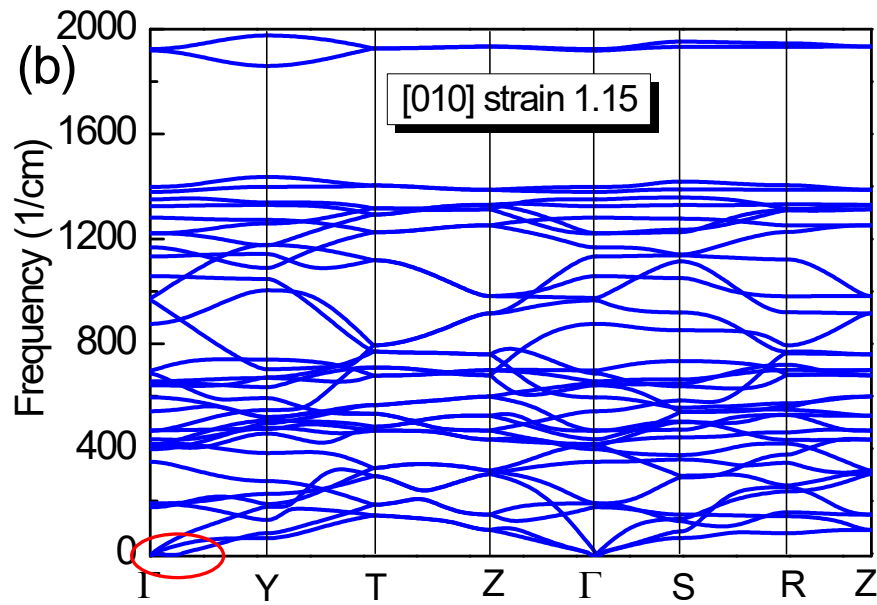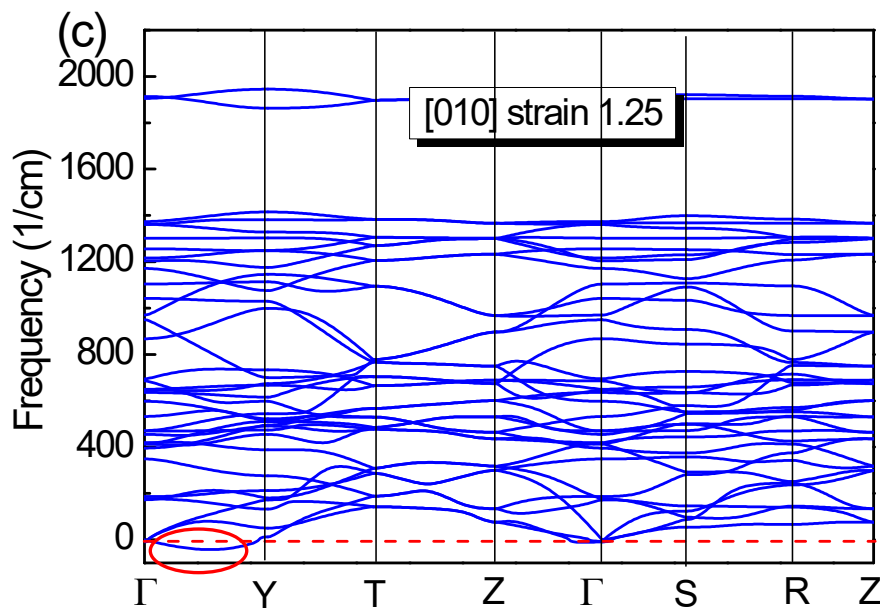

Fig. S10 (a) Crystal structure at the critical strain of 1.55 along the [010] direction, phonon spectra at strains of (b) 1.00 and (c) 1.25 of ort-C24.

(a) At strain 0.26 along the [001] direction

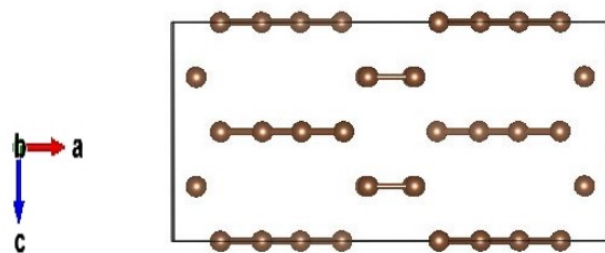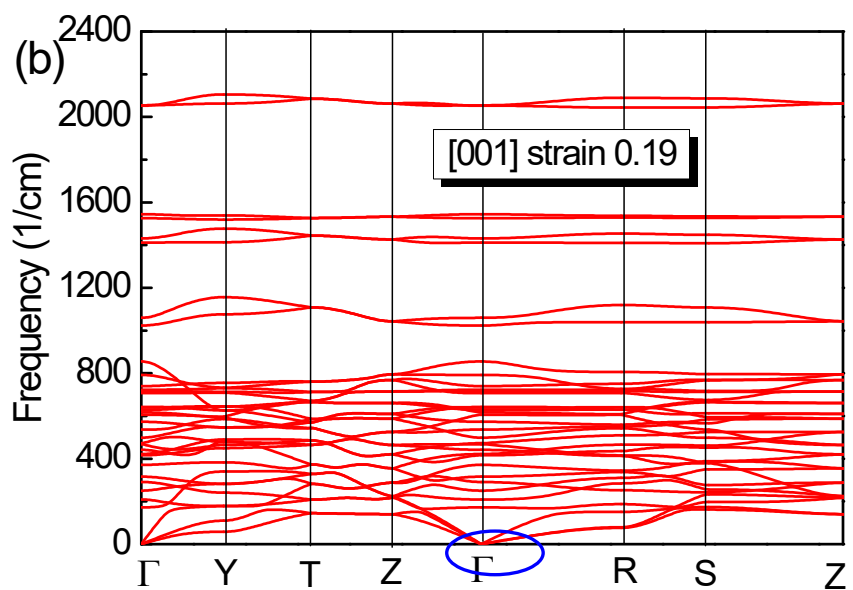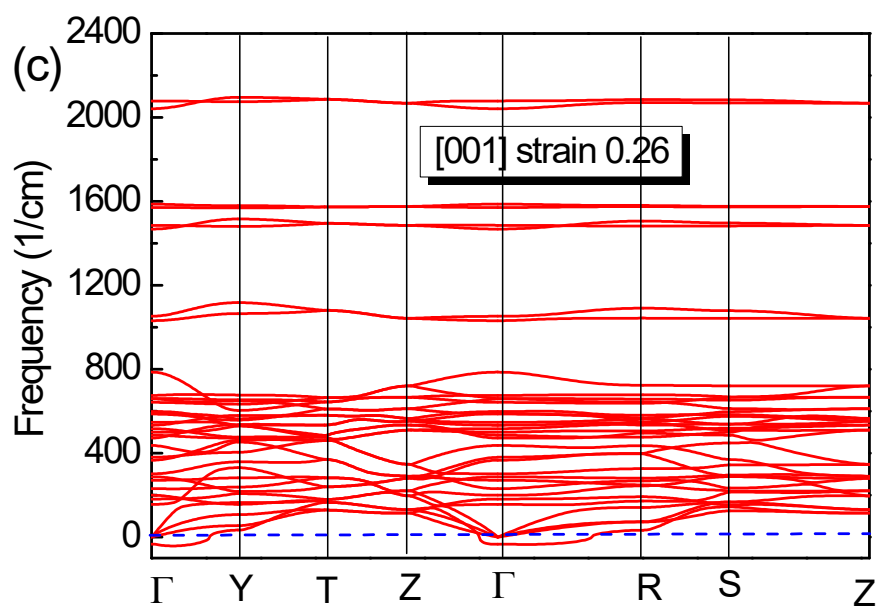

Fig. S11 (a) Crystal structure at the critical strain of 0.26 along the [001] direction, phonon spectra at strains of (b) 0.19 and (c) 0.26 of ort-C24.



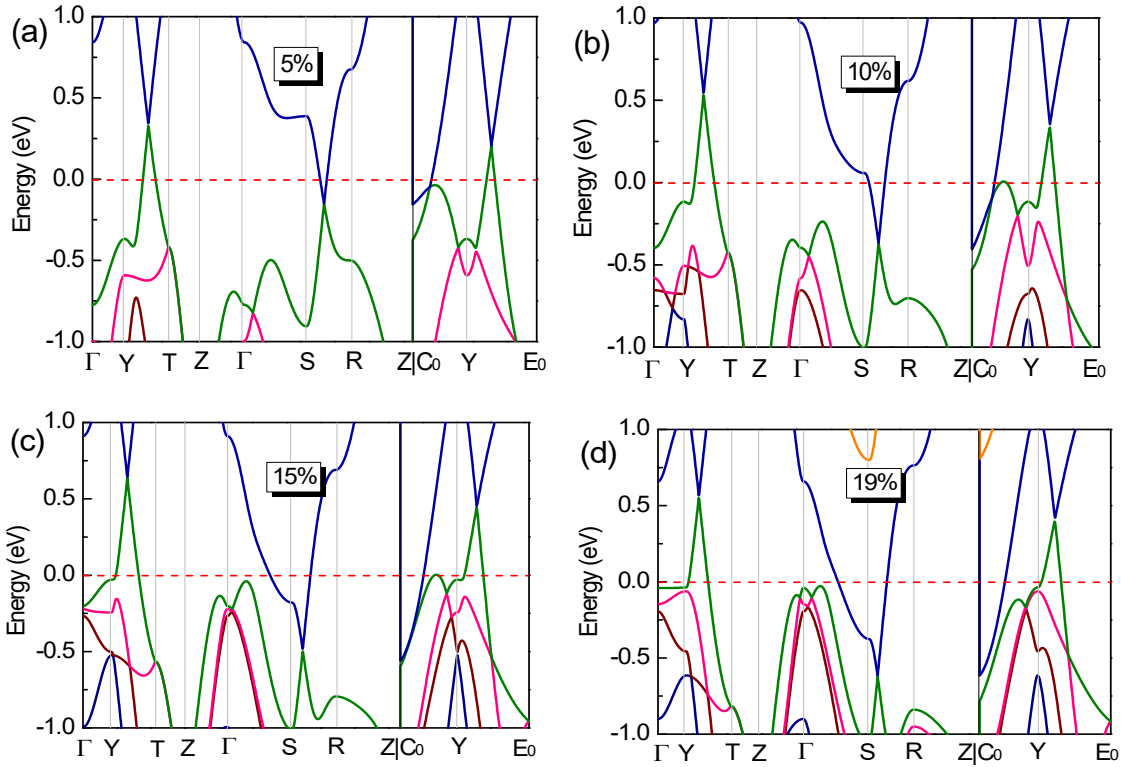

Fig. S12 Band structures of ort-C24 calculated at the strains of (a) 5%, (b) 10%, (c) 15% and (d) 19% along the  $[100]$  direction.

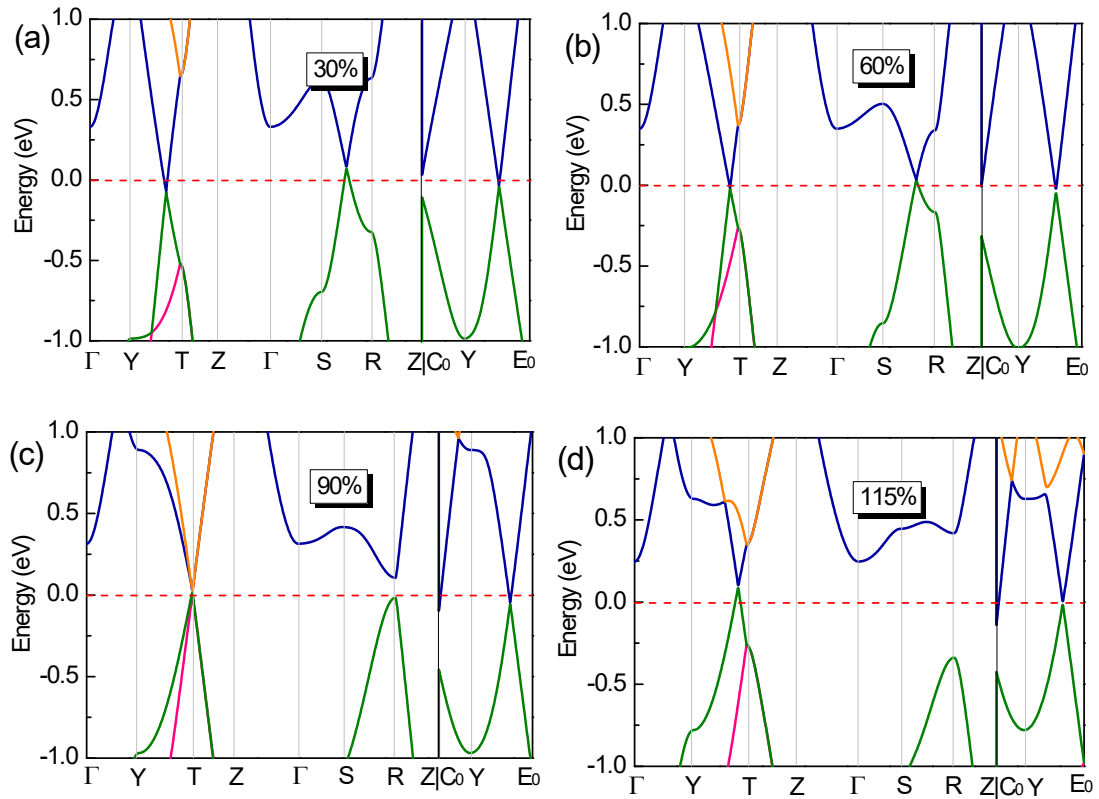

Fig. S13 Band structures of ort-C24 calculated at the strains of (a) 30%, (b) 60%, (c) 90% and (d) 115% along the  $[010]$  direction.

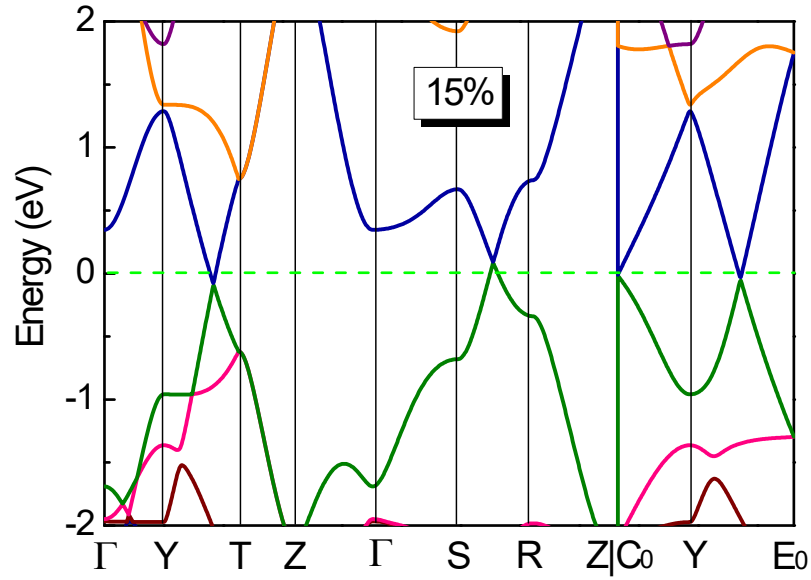

Fig. S14 Calculated band structure of ort-C24 at the strain of 0.15 along the [010] direction.

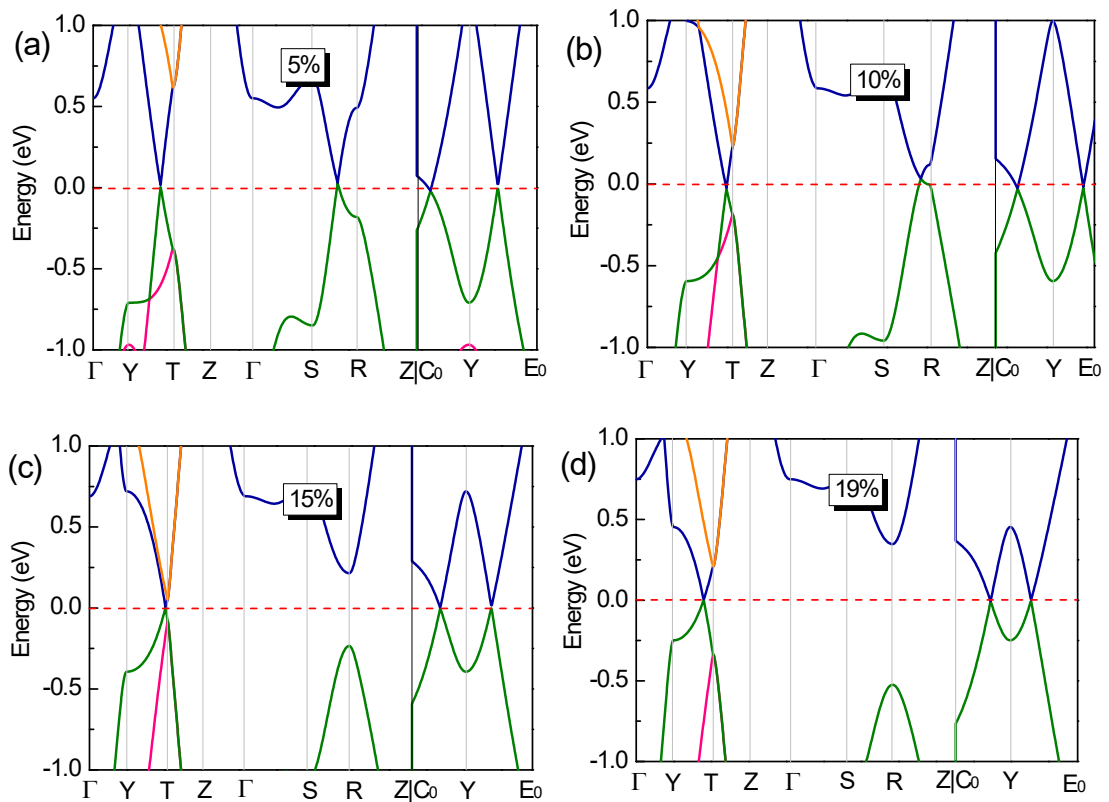

Fig. S15 Band structures of ort-C24 calculated at the strains of (a) 5%, (b) 10%, (c) 15% and (d) 19% along the [001] direction.

**Tables:**

Table S1. Calculated lattice constants  $a$ ,  $b$ ,  $c$  (Å), total energy per atom (eV), volume per atom (Å<sup>3</sup>), bulk moduli (GPa) and its first-order pressure derivatives of ort-C24 and the selected carbon allotropes.

|          | $a$                  | $b$    | $c$            | $E$    | $V$    | $B$                  | $B'$               |
|----------|----------------------|--------|----------------|--------|--------|----------------------|--------------------|
| graphite | 2.459                |        | 6.642          | -9.211 | 8.698  | 274.7                | 3.63               |
| exp.     | 2.459 <sup>[1]</sup> |        | ~ <sup>a</sup> |        |        |                      |                    |
| diamond  | 3.571                |        |                | -9.095 | 5.692  | 431.7                | 3.69               |
| exp.     | 3.567 <sup>[2]</sup> |        |                |        |        | 439.2 <sup>[3]</sup> | 3.6 <sup>[3]</sup> |
| bco-C16  | 7.807                | 4.897  | 3.291          | -8.822 | 7.864  | 293.1                | 3.62               |
| bct-C16  | 6.588                |        | 3.377          | -8.543 | 9.160  | 238.7                | 3.19               |
| oC24     | 13.785               | 8.790  | 2.478          | -9.007 | 12.511 | 185.0                | 3.64               |
| oP-c24   | 4.920                | 12.034 | 3.316          | -8.885 | 8.180  | 279.5                | 3.26               |
| ort-C24  | 12.890               | 4.004  | 4.991          | -8.682 | 10.774 | 179.4                | 1.94               |
| so-C12   | 4.332                | 8.651  | 2.469          | -8.981 | 7.711  | 303.0                | 3.56               |

<sup>a</sup> Ref. [1] indicates that temperature has a notable influence on the lattice  $c$  of graphite, which can vary from 6.672 Å to 6.718 Å when temperature rises from 4.2° to 297°. Although the lattice constant of  $c$  are reported to be 6.711 Å by P. Truccano and R. Chen [Nature, 258 (1975) 136-137], the temperature is not given, so we omit this value here. In our relaxation and calculation, dispersion correction of the Tkatchenko-Scheffler type was used for graphite (IVDW=20).

Table S2. Lattice constants of ort-C24 at selected temperatures and pressures.

| $T$ (K) | $a$    | $b$   | $c$   | $P$ (GPa) | $a$    | $b$   | $c$   |
|---------|--------|-------|-------|-----------|--------|-------|-------|
| 0       | 12.890 | 4.004 | 4.991 | 0         | 12.890 | 4.004 | 4.991 |
| 500     | 12.829 | 4.109 | 4.999 | 5         | 13.034 | 3.450 | 4.973 |
| 1000    | 12.792 | 4.155 | 5.001 | 10        | 13.079 | 3.185 | 4.949 |
| 1500    | 12.764 | 4.193 | 5.006 | 15        | 13.095 | 2.989 | 4.936 |
| 2000    | 12.732 | 4.180 | 5.007 | 20        | 13.079 | 2.898 | 4.916 |
| 2500    | 12.871 | 3.465 | 4.907 | 25        | 12.717 | 2.520 | 4.905 |

#### References:

- [1] Y. Baskin, L. Meyer, Lattice constants of graphite at low temperature, 100 (1955) 544.
- [2] H. Holloway, K.C. Hass, M.A. Tamor, Isotopic dependence of the lattice constant of diamond, Phys. Rev. B, 44 (1991) 7123-7126.
- [3] Q. Hu, B. Li, X. Gao, Y. Bi, L. Su, H. Mao, Ultrasound elasticity of diamond at gigapascal pressures, PNAS, 118 (2021) e2118490118.
